1  
2 **Potently neutralizing human antibodies that block SARS-CoV-2 receptor binding and protect**  
3 **animals**

4  
5 **AUTHORS:** Seth J. Zost<sup>1\*</sup>, Pavlo Gilchuk<sup>1\*</sup>, James Brett Case<sup>3</sup>, Elad Binshtein<sup>1</sup>, Rita E. Chen<sup>2,3</sup>,  
6 Joseph X. Reidy<sup>1</sup>, Andrew Trivette<sup>1</sup>, Rachel S. Nargi<sup>1</sup>, Rachel E. Sutton<sup>1</sup>, Naveenchandra  
7 Suryadevara<sup>1</sup>, Lauren E. Williamson<sup>4</sup>, Elaine C. Chen<sup>4</sup>, Taylor Jones<sup>1</sup>, Samuel Day<sup>1</sup>, Luke  
8 Myers<sup>1</sup>, Ahmed O. Hassan<sup>3</sup>, Natasha M. Kafai<sup>2,3</sup>, Emma S. Winkler<sup>2,3</sup>, Julie M. Fox<sup>3</sup>, James J.  
9 Steinhardt<sup>6</sup>, Kuishu Ren<sup>7</sup>, Yueh-Ming Loo<sup>7</sup>, Nicole L. Kallewaard<sup>7</sup>, David R. Martinez<sup>5</sup>,  
10 Alexandra Schäfer<sup>5</sup>, Lisa E. Gralinski<sup>5</sup>, Ralph S. Baric<sup>5</sup>, Larissa B. Thackray<sup>3</sup>, Michael S.  
11 Diamond<sup>2,3,8,9</sup>, Robert H. Carnahan<sup>1,10\*\*</sup>, James E. Crowe, Jr.<sup>1,4,10\*\*</sup>

12  
13 **Affiliations:**

14 <sup>1</sup>Vanderbilt Vaccine Center, Vanderbilt University Medical Center, Nashville, TN, 37232, USA

15 <sup>2</sup>Department of Pathology & Immunology, Washington University School of Medicine, St.  
16 Louis, MO, 63110, USA

17 <sup>3</sup>Department of Medicine, Washington University School of Medicine, St. Louis, 63110, MO, USA

18 <sup>4</sup>Department of Pathology, Microbiology, and Immunology, Vanderbilt University Medical Center,  
19 Nashville, TN, 37232, USA

20 <sup>5</sup>Department of Epidemiology, University of North Carolina at Chapel Hill, Chapel Hill, NC, 27599,  
21 USA

22 <sup>6</sup>Antibody Discovery and Protein Engineering, BioPharmaceuticals R&D, AstraZeneca,  
23 Gaithersburg, Maryland, 20878, USA

24 <sup>7</sup>Microbial Sciences, BioPharmaceuticals R&D, AstraZeneca, Gaithersburg, Maryland, 20878,  
25 USA

26 <sup>8</sup>Department of Molecular Microbiology, Washington University School of Medicine, St. Louis,  
27 MO, 63110, USA

28 <sup>9</sup>Andrew M. and Jane M. Bursky Center for Human Immunology and Immunotherapy Programs,  
29 Washington University School of Medicine, St. Louis, MO, 63110, USA <sup>10</sup>Department of  
30 Pediatrics, Vanderbilt University Medical Center, Nashville, TN, 37232, USA

31

32 **Contact information:**

33 **James E. Crowe, Jr., M.D.** [*LEAD CONTACT*]

34 Departments of Pediatrics, Pathology, Microbiology, and Immunology, and the Vanderbilt  
35 Vaccine Center

36 **Mail:**

37 Vanderbilt Vaccine Center

38 11475 Medical Research Building IV

39 2213 Garland Avenue

40 Nashville, TN 37232-0417, USA

41 **Telephone** (615) 343-8064

42 **Email** james.crowe@vumc.org

43 **Additional Title Page Footnotes**

44 \* These authors contributed equally

45 \*\*Corresponding authors

46

47

- 48 **Keywords:** Coronavirus; SARS-CoV-2; SARS-CoV; COVID-19; Antibodies, Monoclonal;
- 49 Human; Adaptive Immunity.

50 **The COVID-19 pandemic is a major threat to global health for which there are only**  
51 **limited medical countermeasures, and we lack a thorough understanding of mechanisms of**  
52 **humoral immunity<sup>1,2</sup>. From a panel of monoclonal antibodies (mAbs) targeting the spike**  
53 **(S) glycoprotein isolated from the B cells of infected subjects, we identified several mAbs**  
54 **that exhibited potent neutralizing activity with IC<sub>50</sub> values as low as 0.9 or 15 ng/mL in**  
55 **pseudovirus or wild-type (*wt*) SARS-CoV-2 neutralization tests, respectively. The most**  
56 **potent mAbs fully block the receptor-binding domain of S (S<sub>RBD</sub>) from interacting with**  
57 **human ACE2. Competition-binding, structural, and functional studies allowed clustering**  
58 **of the mAbs into defined classes recognizing distinct epitopes within major antigenic sites**  
59 **on the S<sub>RBD</sub>. Electron microscopy studies revealed that these mAbs recognize distinct**  
60 **conformational states of trimeric S protein. Potent neutralizing mAbs recognizing unique**  
61 **sites, COV2-2196 and COV2-2130, bound simultaneously to S and synergistically**  
62 **neutralized authentic SARS-CoV-2 virus. In two murine models of SARS-CoV-2 infection,**  
63 **passive transfer of either COV2-2916 or COV2-2130 alone or a combination of both mAbs**  
64 **protected mice from severe weight loss and reduced viral burden and inflammation in the**  
65 **lung. These results identify protective epitopes on the S<sub>RBD</sub> and provide a structure-based**  
66 **framework for rational vaccine design and the selection of robust immunotherapeutic**  
67 **cocktails.**

68

69 The S protein of SARS-CoV-2 is the molecular determinant of viral attachment, fusion, and  
70 entry into host cells<sup>3</sup>. The cryo-EM structure of a prefusion-stabilized trimeric S protein  
71 ectodomain (S2P<sub>ecto</sub>) for SARS-CoV-2 reveals similar features to that of the SARS-CoV S  
72 protein<sup>4</sup>. This type I integral membrane protein and class I fusion protein possesses an N-

73 terminal subunit (S1) that mediates binding to receptor and a C-terminal subunit (S2) that  
74 mediates virus–cell membrane fusion. The S1 subunit contains an N-terminal domain (S<sub>NTD</sub>) and  
75 a receptor-binding domain (S<sub>RBD</sub>). SARS-CoV-2 and SARS-CoV, which share approximately  
76 78% sequence identity in their genomes<sup>1</sup> both use human angiotensin-converting enzyme 2  
77 (hACE2) as an entry receptor<sup>5-7</sup>. Previous studies of human immunity to other high-  
78 pathogenicity zoonotic betacoronaviruses including SARS-CoV<sup>8-12</sup> and Middle East respiratory  
79 syndrome (MERS)<sup>13-22</sup> showed that Abs to the viral surface spike (S) glycoprotein mediate  
80 protective immunity. The most potent S protein-specific mAbs appear to neutralize  
81 betacoronaviruses by blocking attachment of virus to host cells by binding to the region on S<sub>RBD</sub>  
82 that directly mediates engagement of the receptor. It is likely that human Abs have promise for  
83 use in modifying disease during SARS-CoV-2 infection, when used for prophylaxis, post-  
84 exposure prophylaxis, or treatment of SARS-CoV-2 infection<sup>23</sup>. Many studies including  
85 randomized controlled trials evaluating convalescent plasma and one trial evaluating  
86 hyperimmune immunoglobulin are ongoing, but it is not yet clear whether such treatments can  
87 reduce morbidity or mortality<sup>24</sup>.

88  
89 We isolated a large panel of SARS-CoV-2 S protein-reactive mAbs from the B cells of two  
90 individuals who were previously infected with SARS-CoV-2 in Wuhan China<sup>25</sup>. A subset of  
91 those antibodies bound to the receptor-binding domain of S (S<sub>RBD</sub>) and exhibited neutralizing  
92 activity in a rapid screening assay with authentic SARS-CoV-2<sup>25</sup>. Here, we defined the antigenic  
93 landscape of SARS-CoV-2 and determined which sites of S<sub>RBD</sub> are the target of protective mAbs.  
94 We tested a panel of 40 anti-S human mAbs we previously pre-selected by a rapid neutralization  
95 screening assay in a quantitative focus reduction neutralization test (FRNT) with SARS-CoV-2

96 strain WA1/2020. These assays revealed the panel exhibited a range of half-maximal inhibitory  
97 concentration ( $IC_{50}$ ) values, from 15 to over 4,000 ng/mL (visualized as a heatmap in Fig. 1a,  
98 values shown in Extended Data Table 1, and full curves shown in Extended Data Fig. 1). We  
99 hypothesized that many of these  $S_{RBD}$ -reactive mAbs neutralize virus infection by blocking  $S_{RBD}$   
100 binding to hACE2. Indeed, most neutralizing mAbs we tested inhibited the interaction of hACE2  
101 with trimeric S protein directly (Fig. 1a, Extended Data Fig. 2). Consistent with these results,  
102 these mAbs also bound strongly to a trimeric S ectodomain ( $S2P_{ecto}$ ) protein or monomeric  $S_{RBD}$   
103 (Fig. 1a, Extended Data Fig. 3). We evaluated whether  $S2P_{ecto}$  or  $S_{RBD}$  binding or hACE2-  
104 blocking potency predicted binding neutralization potency independently, but none of these  
105 measurements correlated with neutralization potency (Fig. 1b-d). However, each of the mAbs in  
106 the highest neutralizing potency tier ( $IC_{50} < 150$  ng/mL) also revealed strongest blocking activity  
107 against hACE2 ( $IC_{50} < 150$  ng/mL) and exceptional binding activity ( $EC_{50} < 2$  ng/mL) to  $S2P_{ecto}$   
108 trimer and  $S_{RBD}$  (Fig. 1e). Representative neutralization curves for two potently neutralizing  
109 mAbs designated COV2-2196 and COV2-2130 are shown in (Fig. 1f). Potent neutralization was  
110 confirmed using pseudovirus neutralization assays, which revealed far more sensitive  
111 neutralization phenotypes than *wt* virus and demonstrated a requirement for the use of live virus  
112 assays for assessment of mAb potency (Fig. 1g). Both of these mAbs bound strongly to  $S2P_{ecto}$   
113 trimer and fully blocked hACE2 binding (Fig. 1h-i).

114

115 We next defined the major antigenic sites on  $S_{RBD}$  for neutralizing mAbs by competition-binding  
116 analysis. We first used a biolayer interferometry-based competition assay with a minimal  $S_{RBD}$   
117 domain to screen for mAbs that competed for binding with the potently neutralizing mAb COV2-  
118 2196 or a recombinant version of the previously described SARS-CoV mAb CR3022, which

119 recognizes a conserved cryptic epitope<sup>10,26</sup>. We identified three major groups of competing mAbs  
120 (Fig. 2a). The largest group of mAbs blocked COV2-2196 but not rCR3022, while some mAbs  
121 were blocked by rCR3022 but not COV2-2196. Two mAbs, including COV2-2130, were not  
122 blocked by either reference mAb. Most mAbs competed with hACE2 for binding, suggesting  
123 that they bound near the hACE2 binding site of the S<sub>RBD</sub>. We used COV2-2196, COV2-2130,  
124 and rCR3022 in an ELISA-based competition-binding assay with trimeric S2P<sub>ecto</sub> protein and  
125 also found that S<sub>RBD</sub> contained three major antigenic sites, with some mAbs likely making  
126 contacts in more than one site (Fig. 2b). Most of the potently neutralizing mAbs directly  
127 competed for binding with COV2-2196.

128  
129 Since COV2-2196 and COV2-2130 did not compete for binding to S<sub>RBD</sub>, we assessed if these  
130 mAbs synergize for virus neutralization, a phenomenon previously observed for SARS-CoV  
131 mAbs<sup>10</sup>. We tested combination responses (see dose-response neutralization matrix, Fig. 2c) in  
132 the FRNT using SARS-CoV-2 and compared these experimental values with the expected  
133 responses calculated by synergy scoring models<sup>27</sup>. The comparison revealed that the combination  
134 of COV2-2196 + COV2-2130 was synergistic (with a synergy score of 17.4, where any score of  
135 >10 indicates synergy). The data in Fig. 2c shows the dose-response synergy matrix and  
136 demonstrates that a combined mAb dose of 79 ng/mL in the cocktail (16 ng/mL of COV2-2196  
137 and 63 ng/mL of COV2-2130) had the same activity as 250 ng/mL of each individual mAb (see  
138 Fig. 2c). This finding shows that using a cocktail the dose of each mAb can be reduced by more  
139 than three-fold to achieve the same potency of virus neutralization *in vitro*.

140

141 We next defined the epitopes recognized by representative mAbs in the two major competition-  
142 binding groups that synergize for neutralization. We performed mutagenesis studies of the  $S_{RBD}$   
143 using alanine or arginine substitution to determine critical residues for binding of neutralizing  
144 mAbs (Extended Data Fig. 4). Loss of binding studies revealed F486A or N487A as critical  
145 residues for COV2-2196 and N487A as a critical residue for COV2-2165, which compete with  
146 one another for binding, and likewise mutagenesis studies for COV2-2130 using K444A and  
147 G447R mutants defined these residues as critical for recognition (Fig. 3a). Previous structural  
148 studies have defined the interaction between the  $S_{RBD}$  and hACE2 (Fig. 3b)<sup>28</sup>. Most of the  
149 interacting residues in the  $S_{RBD}$  are contained within a 60-amino-acid linear peptide that defines  
150 the hACE2 recognition motif (Fig. 3c). We next tested binding of human mAbs to this minimal  
151 peptide and found that potent neutralizing members of the largest competition-binding group  
152 including COV2-2196, COV2-2165, and COV2-2832 recognized this peptide (Fig. 3c),  
153 suggesting these mAbs make critical contacts within the hACE2 recognition motif.

154  
155 We used negative-stain electron microscopy of  $S2P_{ecto}$  trimer/Fab complexes to structurally  
156 determine the epitopes for these mAbs. The potentially neutralizing antibodies COV2-2196 and  
157 COV2-2165 bound to the hACE2 recognition motif of  $S_{RBD}$  and recognized the ‘open’  
158 conformational state of the  $S2P_{ecto}$  trimer (Fig. 3d). The mode of engagement of these two  
159 antibodies differed, however, as the binding pose and the angle relative to the spike ‘body’ for  
160 one was different compared to the other. COV2-2130, which represents the second competition-  
161 binding group, bound to the RBD in the  $S2P_{ecto}$  trimer in the ‘closed’ position (Fig. 3d). Since  
162 COV2-2196 and COV2-2130 did not compete for binding, we attempted to make complexes of  
163 both Fabs bound at the same time to the  $S2P_{ecto}$  trimer. We found that both Fabs bound



164 simultaneously when the S2P<sub>ecto</sub> trimer was in the open position, indicating that COV2-2130 can  
165 recognize the S<sub>RBD</sub> in both conformations (Fig. 3e). Overlaying the two-Fab complex with the  
166 structure of the RBD:CR3022 complex<sup>26</sup>, we observed that these antibodies bind to three distinct  
167 sites on S<sub>RBD</sub>, as predicted based on our competition-binding studies (Fig. 3f).

168  
169 Next, we tested the prophylactic efficacy of COV2-2196 or COV2-2130 monotherapy or a  
170 combination of COV2-2196 + COV2-2130 in a newly developed SARS-CoV-2 infection model  
171 in BALB/c mice in which hACE2 is expressed in the lung after intranasal adenovirus (AdV-  
172 hACE2) transduction. In this relatively stringent disease model, we also administered a single  
173 dose of anti-Ifnar1 antibody to augment virus infection and pathogenesis, which results in a  
174 disseminated interstitial pneumonia (A. Hassan and M. Diamond, submitted for publication). We  
175 passively transferred a single dose of mAb COV2-2196 (10 mg/kg), COV2-2130 (10 mg/kg), a  
176 combination of COV2-2196 + COV2-2130 (5 mg/kg each), or an isotype control mAb (10  
177 mg/kg) to AdV-hACE2-transduced mice one day before intranasal challenge with 4 x 10<sup>5</sup> PFU of  
178 SARS-CoV-2. Prophylaxis with COV2-2196 or COV2-2130 or their combination prevented  
179 severe SARS-CoV-2-induced weight loss through the first week of infection (Fig. 4a).

180 Viral RNA levels were reduced significantly at 7 dpi in the lung and distant sites including the  
181 heart and spleen (Fig. 4b). The expression of interferon gamma (INF-g), IL-6, CXCL10 and  
182 CCL2 cytokine and chemokine genes, which are indicators of inflammation, also was reduced in  
183 the lung of treated mice at 7 dpi—the peak of the disease (Fig. 4c).

184  
185 We also tested COV2-2196 or COV2-2130 or their combination for prophylactic efficacy in an  
186 immunocompetent model using a mouse-adapted (MA) SARS-CoV-2 virus<sup>29</sup> (Fig. 4d). *In vitro*

187 tests showed that the IC<sub>50</sub> values for neutralization were comparable for the *wt* and MA SARS-  
188 CoV-2 viruses for these mAbs (data not shown). Each of the mAb treatments delivered at a dose  
189 of 200 µg/mouse (~ 8 mg/kg) reduced viral RNA levels up to 10<sup>5</sup>-fold at 2 dpi in the lung when  
190 compared to the isotype control group (Fig. 4e, left). Concordantly, all animals from COV2-2196  
191 and COV2-2196 + COV2-2130 treatment group and 8 of 10 animals from COV2-2130 treatment  
192 no longer had infectious virus at 2 dpi in the lung as measured by plaque titer of lung tissue (Fig.  
193 4e, right). Collectively, these results in mice suggested that COV2-2196 or COV2-2130 alone or  
194 in combination are promising candidates for treatment or prevention of COVID-19.

195  
196 Here, we defined the antigenic landscape for a large panel of highly potent mAbs against SARS-  
197 CoV-2. These detailed studies and the screening studies that identified this panel of mAbs from a  
198 larger panel of hundreds<sup>25</sup> demonstrate that although diverse human neutralizing antibodies are  
199 elicited by natural infection with SARS-CoV-2, only a small subset of those mAbs are of high  
200 potency (IC<sub>50</sub><50 ng/mL against live SARS-CoV-2 virus), and therefore, suitable for therapeutic  
201 development. Biochemical and structural analysis of these potent mAbs defined three principal  
202 antigenic sites of vulnerability to neutralization by human mAbs elicited by natural infection  
203 with SARS-CoV on the S<sub>RBD</sub>. Representative mAbs from the two most potent antigenic sites  
204 were shown to synergize *in vitro* and protect as an *in vivo* cocktail. This finding reveals critical  
205 features of effective humoral immunity to SARS-CoV-2 and suggests that the role of synergistic  
206 neutralization activity in polyclonal responses should be explored further. Moreover, as SARS-  
207 CoV-2 continues to circulate, population immunity elicited by natural infection may start to  
208 select for antigenic variants that escape from the selective pressure of neutralizing antibodies,  
209 reinforcing the need to target multiple epitopes of S protein in vaccines or immunotherapeutics.

210 The common S gene variants across the globe reported to date are located at positions D614G,  
211 V483A, L5F, Q675H, H655Y and S939F<sup>30</sup>, far away from the amino acid variants at residues  
212 486 or 487 identified in our mutation studies for the lead mAbs studied here. Rationally-selected  
213 therapeutic cocktails like the one described here might offer even greater resistance to SARS-  
214 CoV-2 escape. These studies set the stage for preclinical evaluation and development of the  
215 identified mAbs as candidates for use as COVID-19 immunotherapeutics in humans.  
216

217 **Data availability.** The EM maps have been deposited at the Electron Microscopy Data Bank  
218 with accession codes EMBD 21965 (S2P<sub>ecto</sub> apo), EMD-21974 (S2P<sub>ecto</sub> + Fab COVs-2165),  
219 EMD-21975 (S2P<sub>ecto</sub> + Fab COVs-2196), EMD-21976 (S2P<sub>ecto</sub> + Fab COVs-2130) and EMD-  
220 21977 (S2P<sub>ecto</sub> + Fab COV2-2196 + Fab COV2-2130). Materials reported in this study will be  
221 made available but may require execution of a Materials Transfer Agreement.

222  
223 **Acknowledgements.** We thank Angela Jones and the staff of the Vanderbilt VANTAGE core  
224 laboratory for expedited sequencing, Ross Trosseth for assistance with data management and analysis,  
225 Robin Bombardi and Cinque Soto of VUMC for technical consultation on genomics approaches, Arthur  
226 Kim, Adam Bailey, Laura VanBlargan, James Earnest, Broc McCune and Swathi Shrihari of WUSTL  
227 for experimental assistance and key reagents, and Kevin M. Tuffy, Seme Diallo, Patrick M.  
228 McTamney, and Lori Clarke of AstraZeneca for generation of protein and pseudovirus reagents and  
229 related data. This study was supported by Defense Advanced Research Projects Agency (DARPA)  
230 grants HR0011-18-2-0001 and HR00 11-18-3-0001, NIH contracts 75N93019C00074 and  
231 75N93019C00062 and the Dolly Parton COVID-19 Research Fund at Vanderbilt. This work was  
232 supported by NIH grant 1S10RR028106-01A1 for the Next Generation Nucleic Acid Sequencer,  
233 housed in Vanderbilt Technologies for Advanced Genomics (VANTAGE) and the Vanderbilt Institute  
234 for Clinical and Translational Research with grant support from (UL1TR002243 from NCATS/NIH).  
235 S.J.Z. was supported by NIH T32 AI095202. J.B.C. is supported by a Helen Hay Whitney Foundation  
236 postdoctoral fellowship. D.R.M. was supported by NIH T32 AI007151 and a Burroughs Wellcome  
237 Fund Postdoctoral Enrichment Program Award. J.E.C. is the recipient of the 2019 Future Insight Prize  
238 from Merck KGaA, Darmstadt Germany, which supported this research with a research grant. The

239 content is solely the responsibility of the authors and does not necessarily represent the official views of  
240 the U.S. government or the other sponsors.

241

242 **Author contributions.** Conceived of the project: S.J.Z., P.G., R.H.C., L.B.T., M.S.D., J.E.C.;

243 Obtained funding: J.E.C. and M.S.D. Performed laboratory experiments: S.J.Z., P.G., J.B.C.,

244 E.B., R.E.C., J.X.R., A.T., R.S.N., R.E.S., N.S., L.E.W., A.O.H., N.M.K., E.W., J.M.F., L.B.T.,

245 J.J.S., K.R., Y.-M.L., A.S., L.E.G., D.R.M.; Performed computational work: E.C.C., T.J., S.D.,

246 L.M.; Supervised research: N.L.K, M.S.D., L.B.T., R.S.B., R.H.C., J.E.C. Wrote the first draft of

247 the paper: S.J.Z., P.G., R.H.C., J.E.C.; All authors reviewed and approved the final manuscript.

248

249 **Competing interests.** R.S.B. has served as a consultant for Takeda and Sanofi Pasteur on issues related

250 to vaccines. M.S.D. is a consultant for Inbios, Vir Biotechnology, NGM Biopharmaceuticals, Eli Lilly,

251 and is on the Scientific Advisory Board of Moderna, a past recipient of unrelated research grant from

252 Moderna and a current recipient of an unrelated research grant Emergent BioSolutions.

253 J.E.C. has served as a consultant for Sanofi and is on the Scientific Advisory Boards of CompuVax and

254 Meissa Vaccines, is a recipient of previous unrelated research grants from Moderna and Sanofi and is

255 Founder of IDBiologics, Inc. Vanderbilt University has applied for patents concerning SARS-CoV-2

256 antibodies that are related to this work. AstraZeneca has filed patents for materials/findings related to

257 this work. J.J.S., K.R., Y.-M.L., and N.L.K. are employees of AstraZeneca and currently hold

258 AstraZeneca stock or stock options. All other authors declared no competing interests.

259

260 **Additional information**

261

262 **Supplementary information** is available for this paper.

263

264 **Correspondence and requests for materials** should be addressed to J.E.C.

265   **REFERENCES**

266

267   1.     Zhou, P., *et al.* A pneumonia outbreak associated with a new coronavirus of probable bat  
268           origin. *Nature* **579**, 270-273 (2020).

269

270   2.     Zhu, N., *et al.* A novel coronavirus from patients with pneumonia in China, 2019. *N Engl*  
271           *J Med* **382**, 727-733 (2020).

272

273   3.     Pillay, T.S. Gene of the month: the 2019-nCoV/SARS-CoV-2 novel coronavirus spike  
274           protein. *J Clin Pathol* (2020).

275

276   4.     Wrapp, D., *et al.* Cryo-EM structure of the 2019-nCoV spike in the prefusion  
277           conformation. *Science* **367**, 1260-1263 (2020).

278

279   5.     Wan, Y., Shang, J., Graham, R., Baric, R.S. & Li, F. Receptor recognition by the novel  
280           Coronavirus from Wuhan: an Analysis Based on Decade-Long Structural Studies of SARS  
281           Coronavirus. *J Virol* **94**(2020).

282

283   6.     Hoffmann, M., *et al.* SARS-CoV-2 cell entry depends on ACE2 and TMPRSS2 and is  
284           blocked by a clinically proven protease inhibitor. *Cell* **181**, 271-280 e278 (2020).

285

286   7.     Li, W., *et al.* Angiotensin-converting enzyme 2 is a functional receptor for the SARS  
287           coronavirus. *Nature* **426**, 450-454 (2003).

288

289 8. Sui, J., *et al.* Potent neutralization of severe acute respiratory syndrome (SARS)  
290 coronavirus by a human mAb to S1 protein that blocks receptor association. *Proc Natl*  
291 *Acad Sci U S A* **101**, 2536-2541 (2004).

292

293 9. ter Meulen, J., *et al.* Human monoclonal antibody as prophylaxis for SARS coronavirus  
294 infection in ferrets. *Lancet* **363**, 2139-2141 (2004).

295

296 10. ter Meulen, J., *et al.* Human monoclonal antibody combination against SARS coronavirus:  
297 synergy and coverage of escape mutants. *PLoS Med* **3**, e237 (2006).

298

299 11. Zhu, Z., *et al.* Potent cross-reactive neutralization of SARS coronavirus isolates by human  
300 monoclonal antibodies. *Proc Natl Acad Sci U S A* **104**, 12123-12128 (2007).

301

302 12. Rockx, B., *et al.* Structural basis for potent cross-neutralizing human monoclonal antibody  
303 protection against lethal human and zoonotic severe acute respiratory syndrome  
304 coronavirus challenge. *J Virol* **82**, 3220-3235 (2008).

305

306 13. Chen, Z., *et al.* Human neutralizing monoclonal antibody inhibition of Middle East  
307 respiratory syndrome coronavirus replication in the common marmoset. *J Infect Dis* **215**,  
308 1807-1815 (2017).

309



- 310 14. Choi, J.H., *et al.* Characterization of a human monoclonal antibody generated from a B-  
311 cell specific for a prefusion-stabilized spike protein of Middle East respiratory syndrome  
312 coronavirus. *PLoS One* **15**, e0232757 (2020).  
313
- 314 15. Niu, P., *et al.* Ultrapotent human neutralizing antibody repertoires against Middle East  
315 respiratory syndrome coronavirus from a recovered patient. *J Infect Dis* **218**, 1249-1260  
316 (2018).  
317
- 318 16. Wang, L., *et al.* Importance of neutralizing monoclonal antibodies targeting multiple  
319 antigenic sites on the Middle East respiratory syndrome coronavirus spike glycoprotein to  
320 avoid neutralization escape. *J Virol* **92**(2018).  
321
- 322 17. Wang, N., *et al.* Structural definition of a neutralization-sensitive epitope on the MERS-  
323 CoV S1-NTD. *Cell Rep* **28**, 3395-3405 e3396 (2019).  
324
- 325 18. Zhang, S., *et al.* Structural definition of a unique neutralization epitope on the receptor-  
326 binding domain of MERS-CoV spike glycoprotein. *Cell Rep* **24**, 441-452 (2018).  
327
- 328 19. Corti, D., *et al.* Prophylactic and postexposure efficacy of a potent human monoclonal  
329 antibody against MERS coronavirus. *Proc Natl Acad Sci U S A* **112**, 10473-10478 (2015).  
330
- 331 20. Jiang, L., *et al.* Potent neutralization of MERS-CoV by human neutralizing monoclonal  
332 antibodies to the viral spike glycoprotein. *Sci Transl Med* **6**, 234ra259 (2014).

- 333
- 334 21. Tang, X.C., *et al.* Identification of human neutralizing antibodies against MERS-CoV and  
335 their role in virus adaptive evolution. *Proc Natl Acad Sci U S A* **111**, E2018-2026 (2014).
- 336
- 337 22. Ying, T., *et al.* Exceptionally potent neutralization of Middle East respiratory syndrome  
338 coronavirus by human monoclonal antibodies. *J Virol* **88**, 7796-7805 (2014).
- 339
- 340 23. Jiang, S., Hillyer, C. & Du, L. Neutralizing antibodies against SARS-CoV-2 and other  
341 human coronaviruses. *Trends Immunol* **41**, 355-359 (2020).
- 342
- 343 24. Valk, S.J., *et al.* Convalescent plasma or hyperimmune immunoglobulin for people with  
344 COVID-19: a rapid review. *Cochrane Database Syst Rev* **5**, CD013600 (2020).
- 345
- 346 25. Zost, S.J., *et al.* Rapid isolation and profiling of a diverse panel of human monoclonal  
347 antibodies targeting the SARS-CoV-2 spike protein. *bioRxiv*, 2020.2005.2012.091462  
348 (2020).
- 349
- 350 26. Yuan, M., *et al.* A highly conserved cryptic epitope in the receptor binding domains of  
351 SARS-CoV-2 and SARS-CoV. *Science* **368**, 630-633 (2020).
- 352
- 353 27. Ianevski, A., He, L., Aittokallio, T. & Tang, J. SynergyFinder: a web application for  
354 analyzing drug combination dose-response matrix data. *Bioinformatics* **33**, 2413-2415  
355 (2017).

356

357 28. Lan, J., *et al.* Structure of the SARS-CoV-2 spike receptor-binding domain bound to the  
358 ACE2 receptor. *Nature* **581**, 215-220 (2020).

359

360 29. Dinno, K.H., *et al.* A mouse-adapted SARS-CoV-2 model for the evaluation of COVID-  
361 19 medical countermeasures. *bioRxiv*, 2020.2005.2006.081497 (2020).

362

363 30. Laha, S., *et al.* Characterizations of SARS-CoV-2 mutational profile, spike protein stability  
364 and viral transmission. *bioRxiv*, 2020.2005.2003.066266 (2020).

365

366

367 **Figure Legends:**

368 **Figure 1. Functional characteristics of neutralizing SARS-CoV-2 mAbs.**

369 **a.** Heatmap of mAb neutralization activity, hACE2 blocking activity, and binding to either  
370 trimeric S2Pecto protein or monomeric SRBD. MAbs are ordered by neutralization potency  
371 (highest at the top, lowest at the bottom). Dashed lines indicate the 13 antibodies with a  
372 neutralization IC<sub>50</sub> value lower than 150 ng/mL for wt virus. IC<sub>50</sub> values are visualized for viral  
373 neutralization and hACE2 blocking, while EC<sub>50</sub> values are visualized for binding. A  
374 recombinant form of the cross-reactive SARS-CoV SRBD mAb CR3022 is shown as a positive  
375 control, while the anti-dengue mAb 2D22 is shown as a negative control. Data are representative  
376 of at least 2 independent experiments, each performed in technical duplicate. No inhibition  
377 indicates an IC<sub>50</sub> value of >10,000 ng/mL, while no binding indicates an EC<sub>50</sub> value of >10,000  
378 ng/mL.

379 **b-d.** Correlation of hACE2 blocking, S2Pecto trimer binding, or SRBD binding of mAbs with  
380 their neutralization activity. R2 values are shown for linear regression analysis of log-  
381 transformed values. Purple circles indicate mAbs with a neutralization IC50 value lower than  
382 150 ng/mL.

383 **e.** Correlation of hACE2 blocking and S2Pecto trimer binding. R2 values are shown for linear  
384 regression analysis of log-transformed values.

385 **f.** Neutralization curves for COV2-2196 and COV2-2130 in a neutralization assay against  
386 authentic SARS-CoV-2 virus. Calculated IC50 values are denoted on the graph. Error bars  
387 denote the standard deviation of each point. Data are representative of at least 2 independent  
388 experiments, each performed in technical duplicate.

389 **g.** Neutralization curves for COV2-2196 and COV2-2130 in a pseudovirus neutralization assay.  
390 Error bars denote the standard deviation of each point. Values shown are technical duplicates  
391 from a single experiment. Calculated IC50 values from a minimum of 6 experiments are denoted  
392 on the graph.

393 **h.** hACE2 blocking curves for COV2-2196, COV2-2130, and the non-blocking SARS-CoV mAb  
394 rCR3022 in the hACE2 blocking ELISA. Calculated IC50 values are denoted on the graph. Error  
395 bars denote the standard deviation of each point. Values shown are technical triplicates from a  
396 representative experiment repeated twice.

397 **i.** ELISA binding of COV2-2196, COV2-2130, and rCR3022 to trimeric S2Pecto. Calculated  
398 EC50 values are denoted on the graph. Error bars denote the standard deviation of each point.  
399 Values shown are technical triplicates from a representative experiment repeated twice.

400

401

402

403 **Figure 2. Epitope mapping of mAbs by competition-binding analysis and synergistic**

404 **neutralization by a pair of mAbs.**

405 **a.** Left: biolayer interferometry-based competition binding assay measuring the ability of mAbs

406 to prevent binding of reference mAbs COV2-2196 and rCR3022 to RBD fused to mouse Fc

407 (RBD-mFc) loaded onto anti-mouse Fc biosensors. Values in squares are % of binding of the

408 reference mAb in the presence of the competing mAb relative to a mock-competition control.

409 Black squares denote full competition (<33% of binding relative to no-competition control),

410 while white squares denote no competition (>67% of binding relative to no-competition control).

411 Right: biolayer interferometry-based competition binding assay measuring the ability of mAbs to

412 prevent binding of hACE2. Values denote % binding of hACE2, normalized to hACE2 binding

413 in the absence of competition. Red color denotes competition of mAb with hACE2.

414 **b.** Competition of neutralizing mAb panel with reference mAbs COV2-2130, COV2-2196, or

415 rCR3022. Reference mAbs were biotinylated and binding of reference mAbs to trimeric S2Pecto

416 was measured in the presence of saturating amounts of each mAb in a competition ELISA.

417 ELISA signal for each reference mAb was normalized to the signal in the presence of the non-

418 binding anti-dengue mAb 2D22. Black denotes full competition (<25% binding of reference

419 mAb), grey denotes partial competition (25-60% binding of reference mAb), and white denotes

420 no competition (>60% binding of reference mAb).

421 **c.** Neutralization dose-response matrix of wild-type SARS-CoV-2 by COV2-2196 and COV2-

422 2130. Axes denote the concentration of each mAb. Experiment was performed in technical

423 triplicate. Shown is a representative experiment that was performed in technical triplicate. %

424 neutralization for each combination of mAbs is shown in each square. A white-to-red heatmap

425 denotes 0% neutralization to 100% neutralization, respectively. **d.** Synergy map calculated based  
426 on the SARS-CoV-2 neutralization in the above panel. Red color denotes areas where synergistic  
427 neutralization was observed, and a black box denotes the area of maximal synergy between the  
428 two mAbs.

429

### 430 **Figure 3. Epitope identification and structural characterization of mAbs.**

431 **a.** Identification of critical contact residues by alanine and arginine mutagenesis. Top: binding of  
432 COV2-2130 (gold), COV2-2165 (maroon) or COV2-2196 (dark purple) to wild-type (wt) or  
433 mutant SRBD constructs measured by biolayer interferometry. Shown on y-axis is the response  
434 normalized to the signal observed for binding to wt SRBD. Bottom: representative binding  
435 curves for COV2-2196 to wt or SRBD constructs with critical contact residues mutated.

436 **b.** Crystal structure of SARS-CoV-2 (blue) and hACE2 (green) (PDB (6M0J)). The hACE2  
437 recognition motif is colored orange. Critical contact residues for COV2-2130 are shown as gold  
438 spheres, while critical contact residues for COV2-2196 are shown as purple spheres.

439 **c.** ELISA binding of mAbs to the 60-amino-acid hACE2 recognition motif. r2D22, an anti-  
440 dengue mAb, is shown as a negative control. Bottom: structure of hACE2 recognition motif in  
441 orange with COV2-2196 critical contact residues shown in purple.

442 **d.** Single-Fab:S2Pecto trimer complexes visualized by negative-stain electron microscopy for  
443 COV2-2130 (gold), COV2-2165 (maroon), or COV2-2196 (dark purple). The RBD is shown in  
444 blue and the S N-terminal domain (NTD) is shown in red. Electron density is shown in grey.  
445 Trimer state (open or closed) is denoted for each complex. Representative 2D class averages for  
446 each complex are shown at the bottom (box size 128 pixel).

447 e. COV2-2130 and COV2-2196 Fabs in complex with S2Pecto trimer. Simultaneous binding of  
448 COV2-2130 (gold) and COV2-2196 (purple) Fabs to S2Pecto trimer. Electron density is shown  
449 in grey. Trimer state (open or closed) is denoted. Representative 2D class averages for the  
450 complexes are shown at the bottom (box size 128 pixels). All images were made with Chimera.  
451 f. Competition-binding analysis visualized on S2Pecto trimer. The CR3022 crystal structure was  
452 docked into the double-Fab:S2Pecto trimer structure. CR3022 is shown in cyan. Bottom: a  
453 quantitative Venn diagram notes the number of mAbs in each competition group and the overlap  
454 between groups.

455

456 **Figure 4. Protective efficacy of neutralizing human mAbs against SARS-CoV-2 infection.**

457 a. SARS-CoV-2 challenge model. Ten to eleven-week-old BALB/c mice (two experiments of 4-  
458 5 mice per group) were treated with anti-Ifnar1 mAb and transduced with AdV-hACE2 via the  
459 i.n. route one day later. After four days, mice were treated via the i.p. route with 200 µg of mAbs  
460 CoV2-2196, -2130, or combination (1:1 ratio) or isotype control mAb. One day later, SARS-  
461 CoV-2 was inoculated via the i.n. route. Tissues were harvested at 7 dpi for analysis (c, d).

462 b. Body weight change of mice in panel a. (two-way ordinary ANOVA with Tukey's post-test:  
463 \*\*\*\* P < 0.0001).

464 c. Viral burden in the lung, spleen and heart was measured by RT-qPCR: Kruskal-Wallis  
465 ANOVA with Dunn's post-test (\*, P < 0.05, \*\* P < 0.01, \*\*\* P < 0.001, \*\*\*\* P < 0.0001). The  
466 dashed line indicates the assay limit of detection.

467 d. Cytokine and chemokine gene expression was measured by qPCR analysis. Kruskal-Wallis  
468 ANOVA with Dunn's post-test (\*, P < 0.05, \*\* P < 0.01, \*\*\* P < 0.001).

469 e. MA-SARS-CoV-2 challenge model. Twelve-week-old BALB/c mice (n=10) were inoculated  
470 with 105 PFU of MA-SARS-CoV-2 via the i.n. route. Body weight change of mice is shown.  
471 f. Viral burden in the lung was measured at 2 dpi by RT-qPCR (left) or plaque assay (right) from  
472 (e): Kruskal-Wallis ANOVA with Dunn's post-test (\*\*\*)  $P < 0.001$ , \*\*\*\*  $P < 0.0001$ ).

473

## 474 **Supplementary Information**

475

476 **Extended Data Figure. 1. SARS-CoV-2 neutralization curves for mAb panel.** Neutralization  
477 of authentic SARS-CoV-2 by human mAbs. Mean  $\pm$  SD of technical duplicates is shown. Data  
478 represent one of two or more independent experiments

479

480 **Extended Data Figure 2. Inhibition curves for mAb inhibition of S2P<sub>ecto</sub> binding to hACE2.**

481 Blocking of hACE2 binding to S2P<sub>ecto</sub> by anti-SARS-CoV-2 neutralizing human mAbs. Mean  $\pm$   
482 SD of triplicates of one experiment is shown. Antibodies CR3022 and 2D22 served as controls.

483

484 **Extended Data Figure. 3. ELISA binding of anti-SARS-CoV-2 neutralizing human mAbs to**

485 **trimeric S<sub>RBD</sub>, S2P<sub>ecto</sub>, or SARS-CoV S2P<sub>ecto</sub> antigen.** Mean  $\pm$  SD of triplicates and

486 representative of two experiments are shown. Antibodies CR3022 and 2D22 served as controls.

487

488 **Extended Data Figure. 4. Mapping of mAb critical contact residues by alanine and arginine**

489 **mutagenesis and biolayer interferometry.**

490 **a. Left:** Response values for mAb binding to *wt* or mutant S<sub>RBD</sub> constructs normalized to *wt*.

491 Asterisks denote residues where increased dissociation of mAb was observed, likely indicating



492 the residue is proximal to mAb epitope. *Right*: full response curves for mAb association and  
493 dissociation with *wt* or mutant S<sub>RBD</sub> constructs.

494 **b.** Structure of the RBD highlighting the critical contact residues for several mAbs and their  
495 location on the structure.

496

**Figure 1**

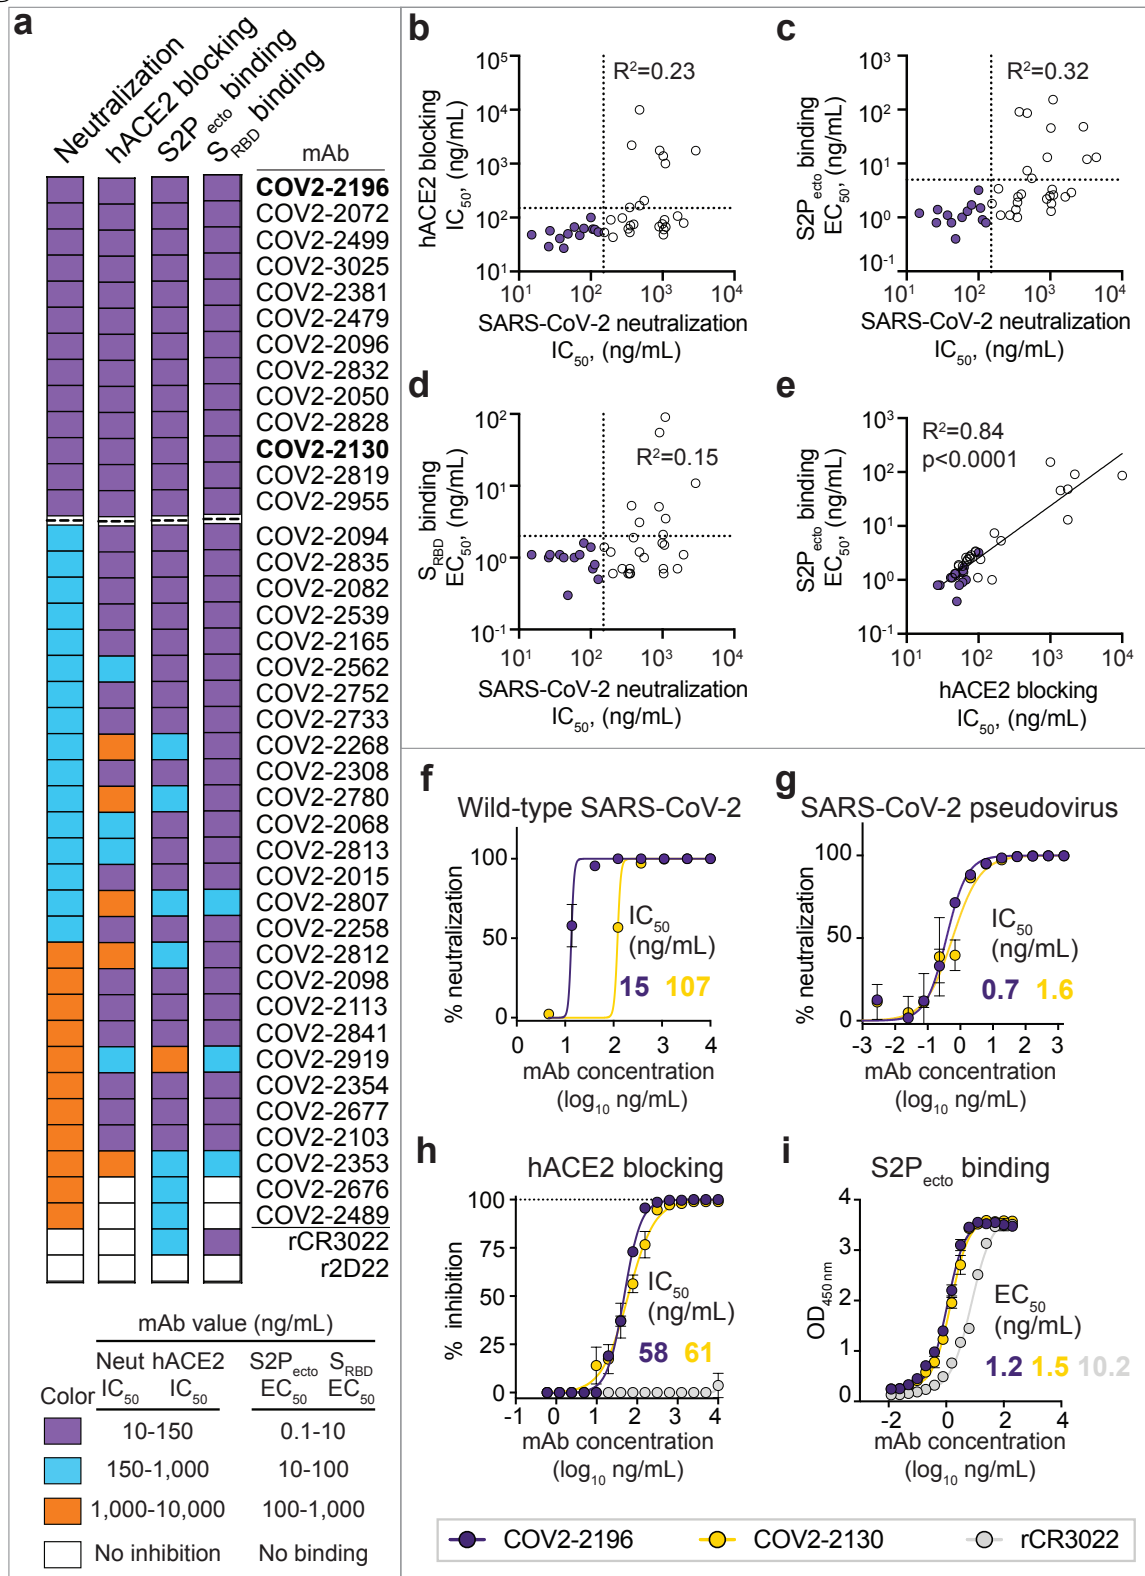

## Figure 2

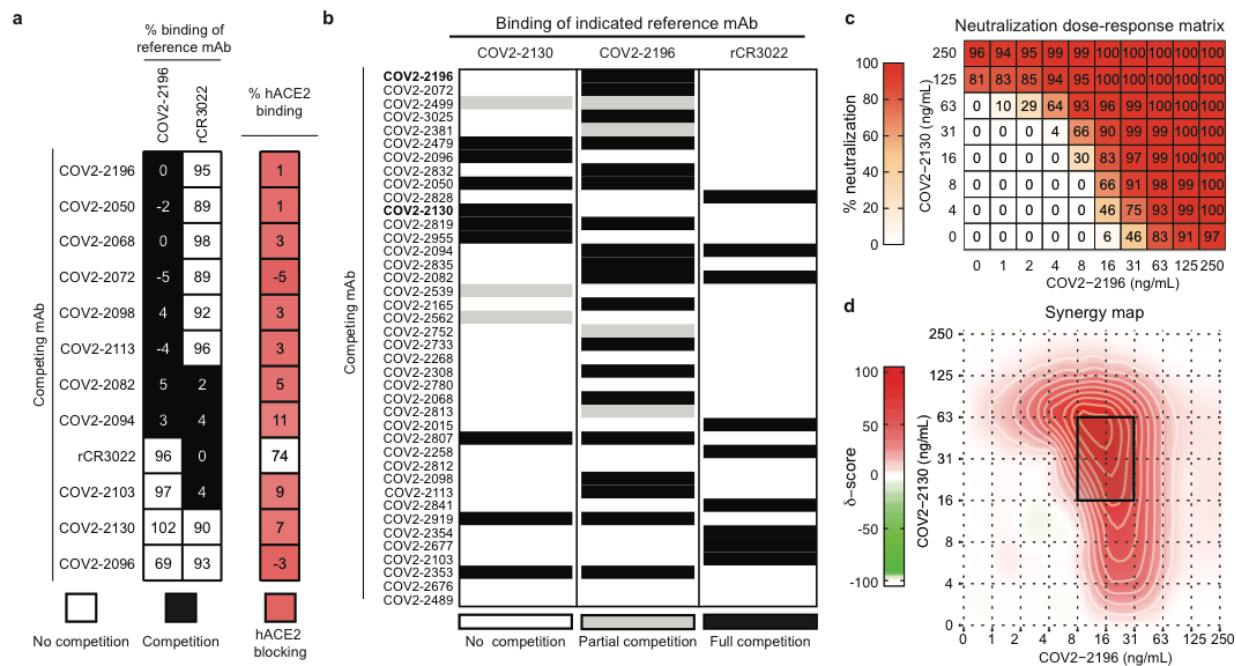

**Figure 3**

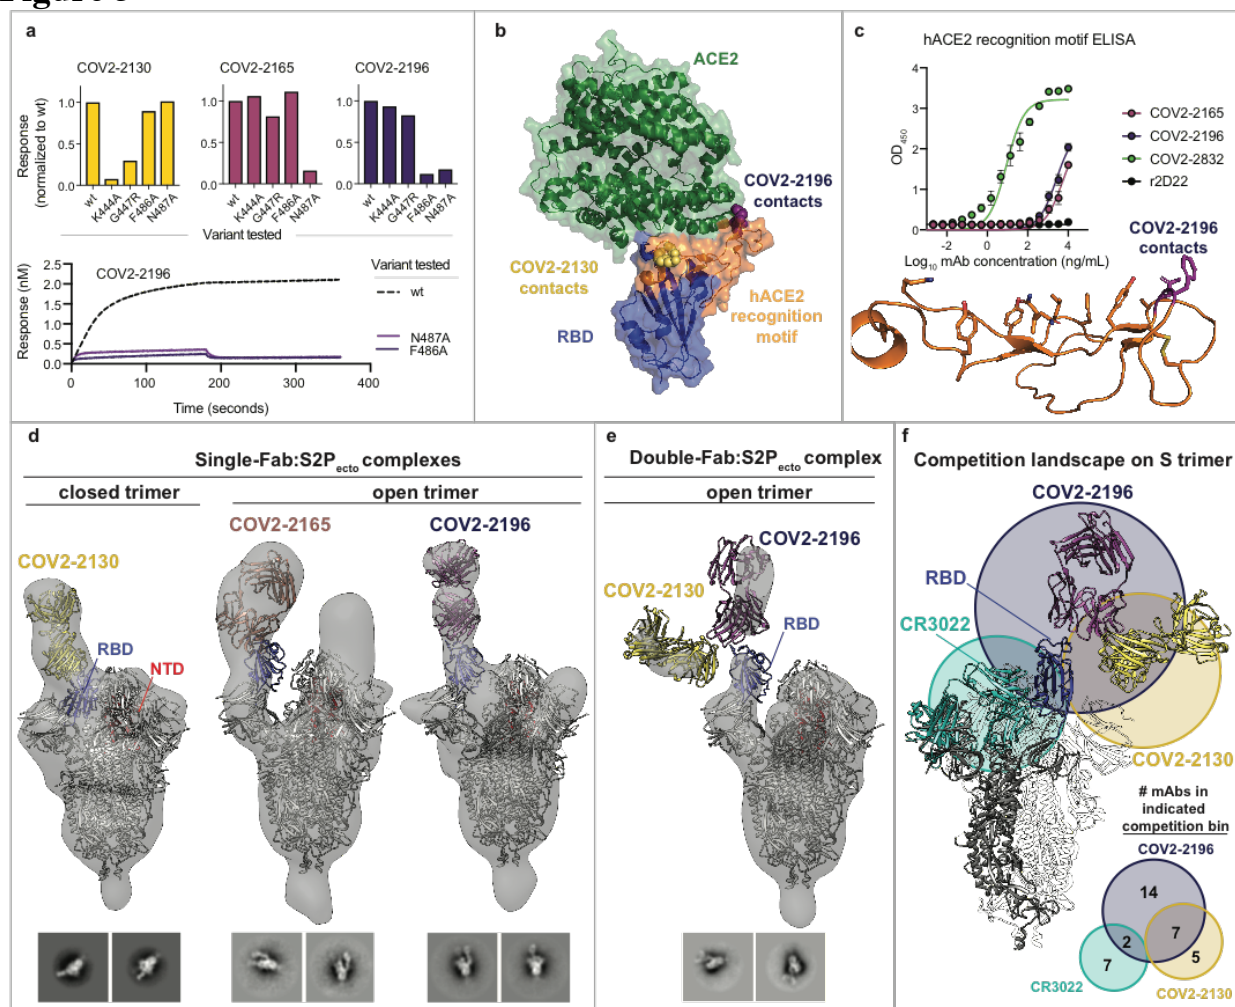

**Figure 4**

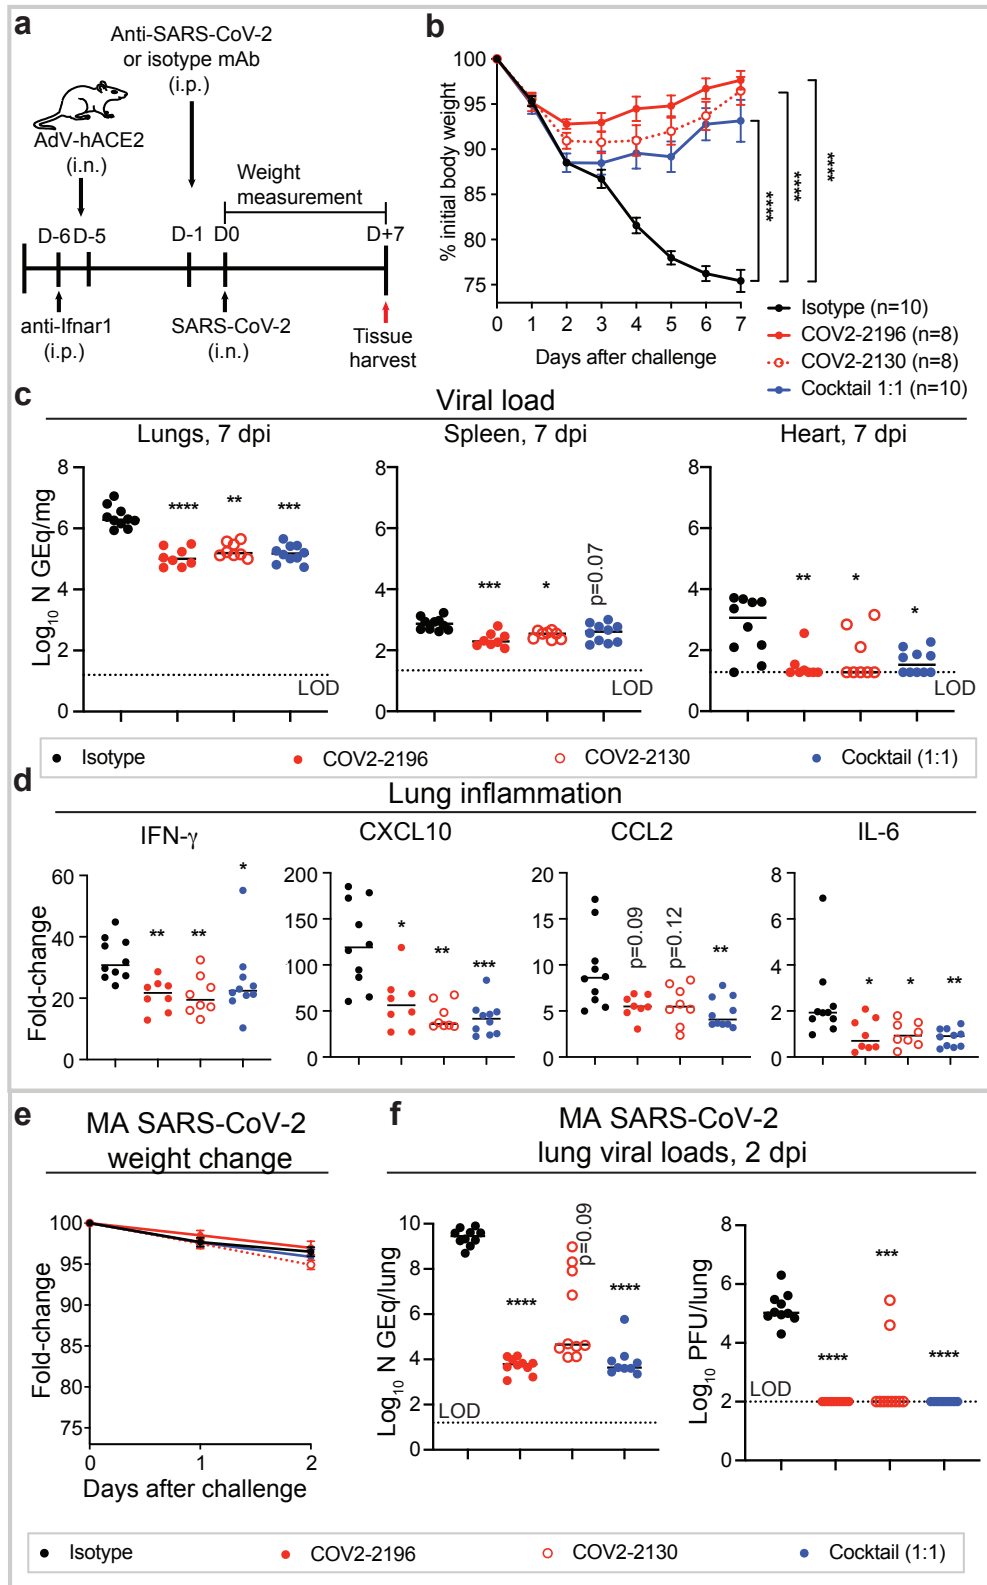

## Extended Data Figure 1

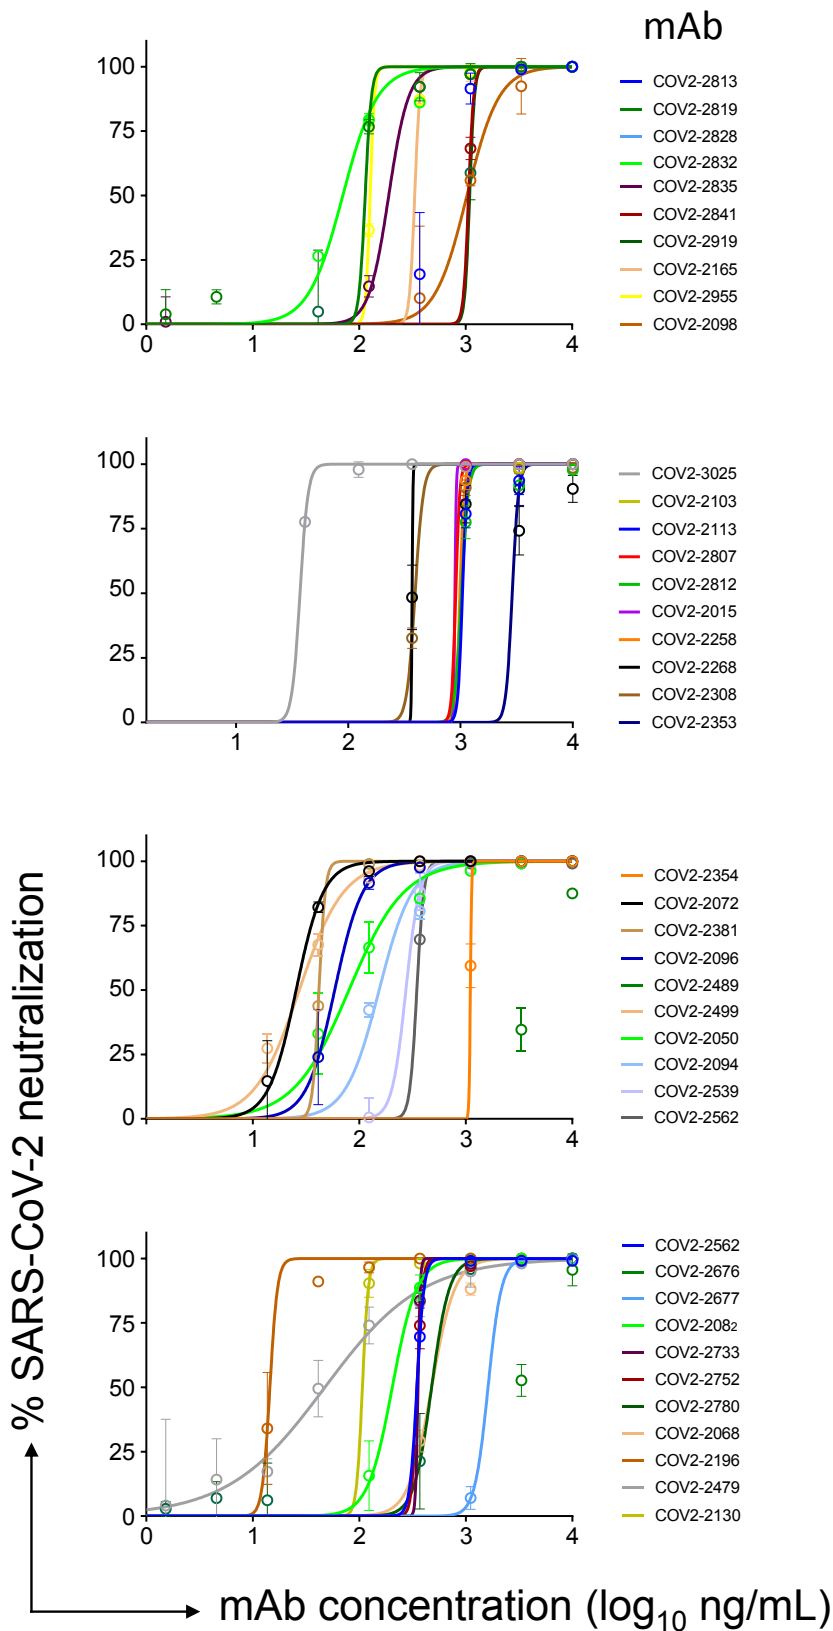

## Extended Data Figure 2

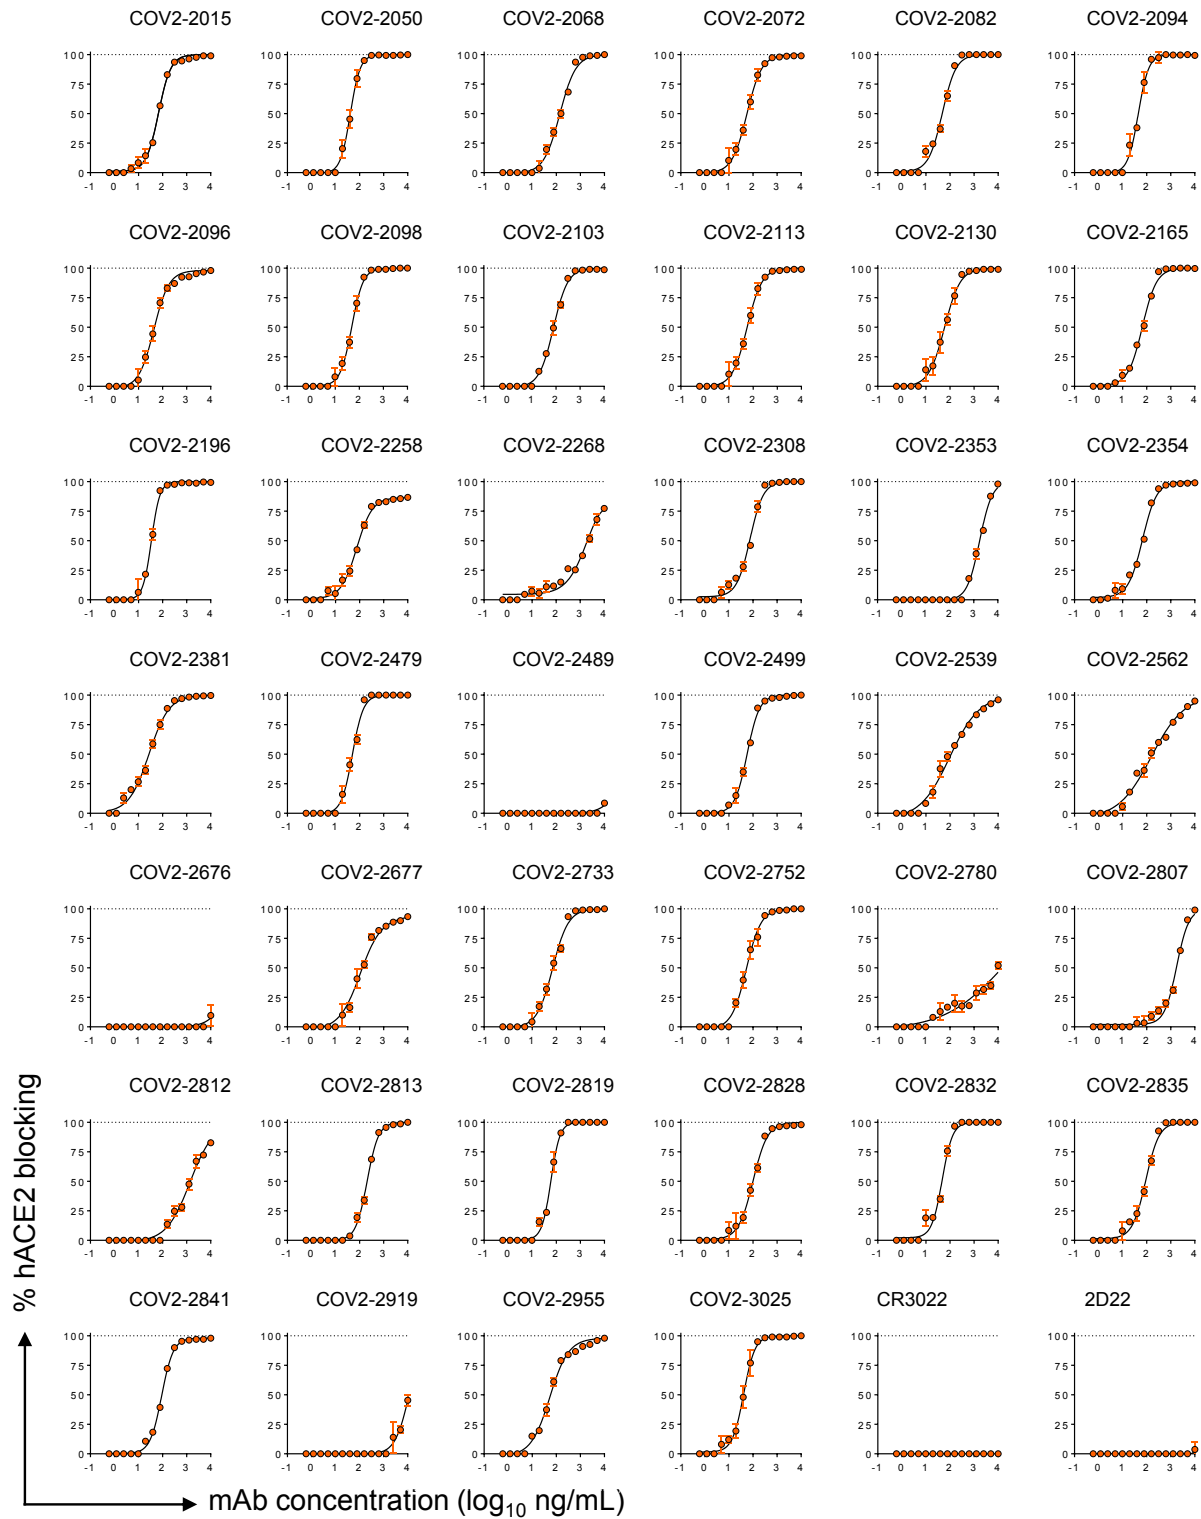

## Extended Data Figure 3

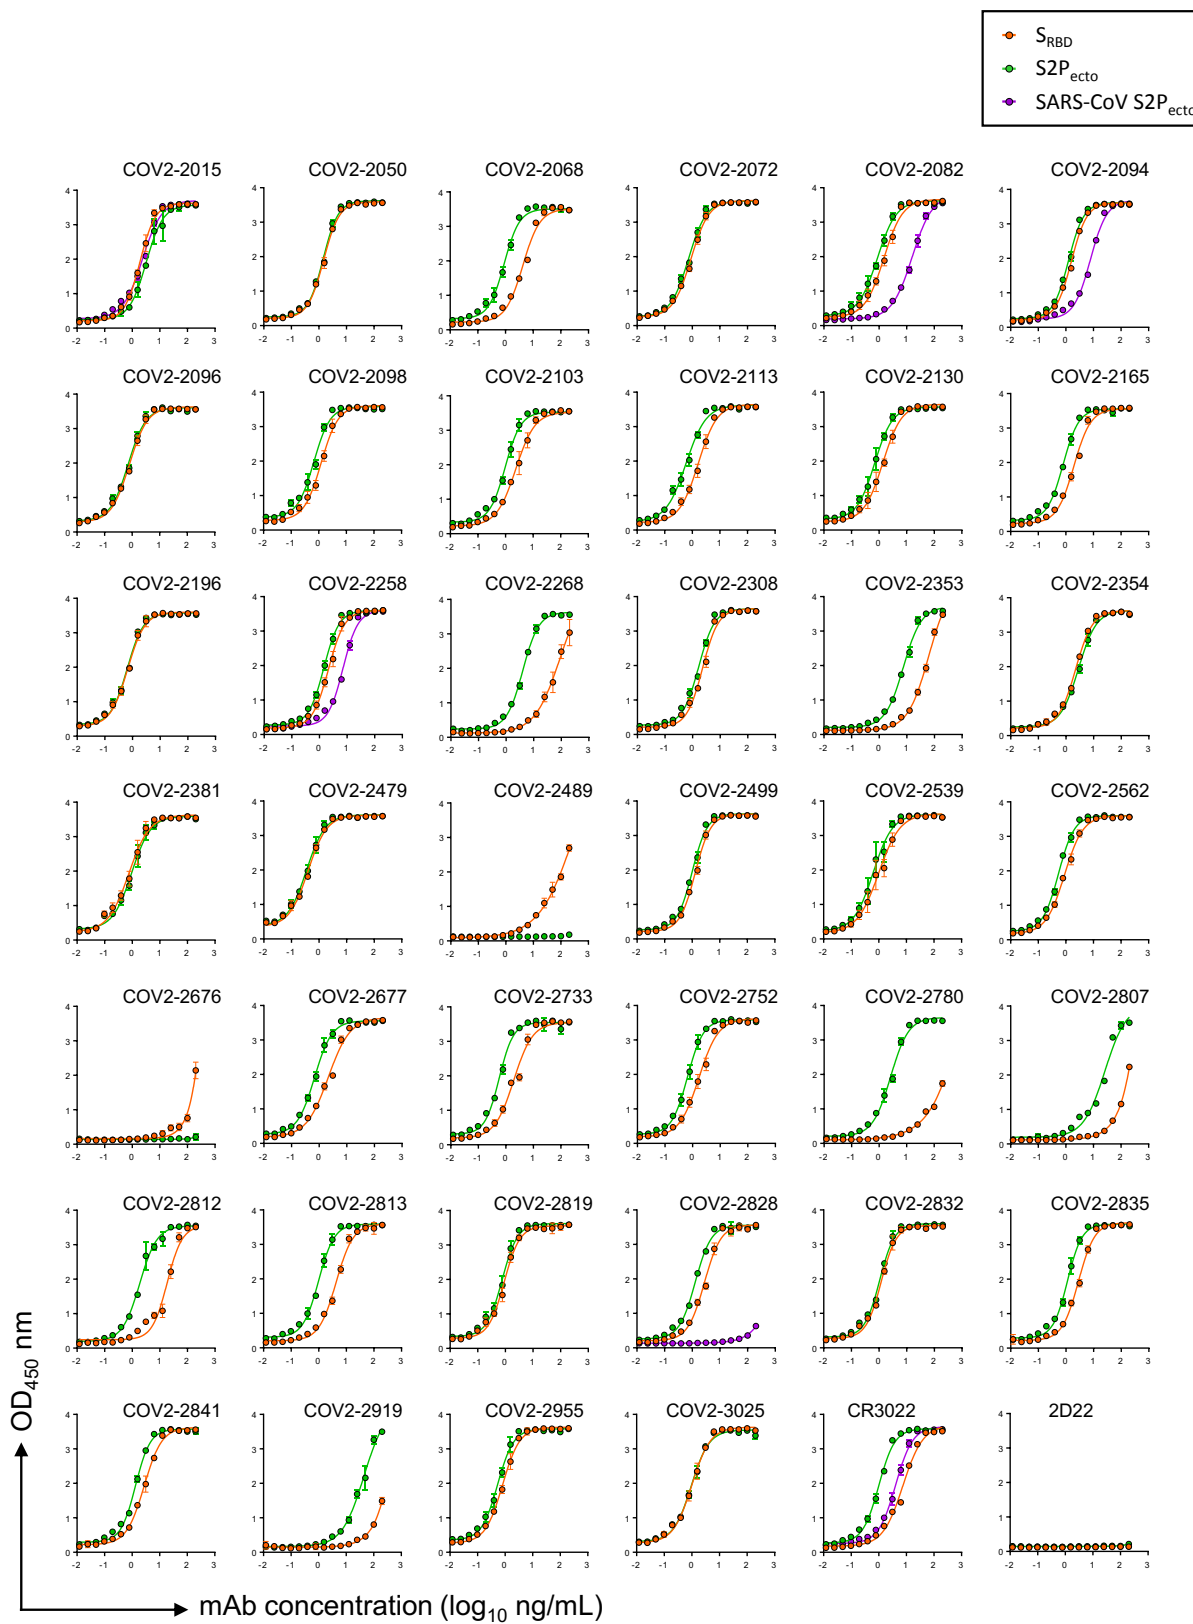



## Extended Data Figure 4

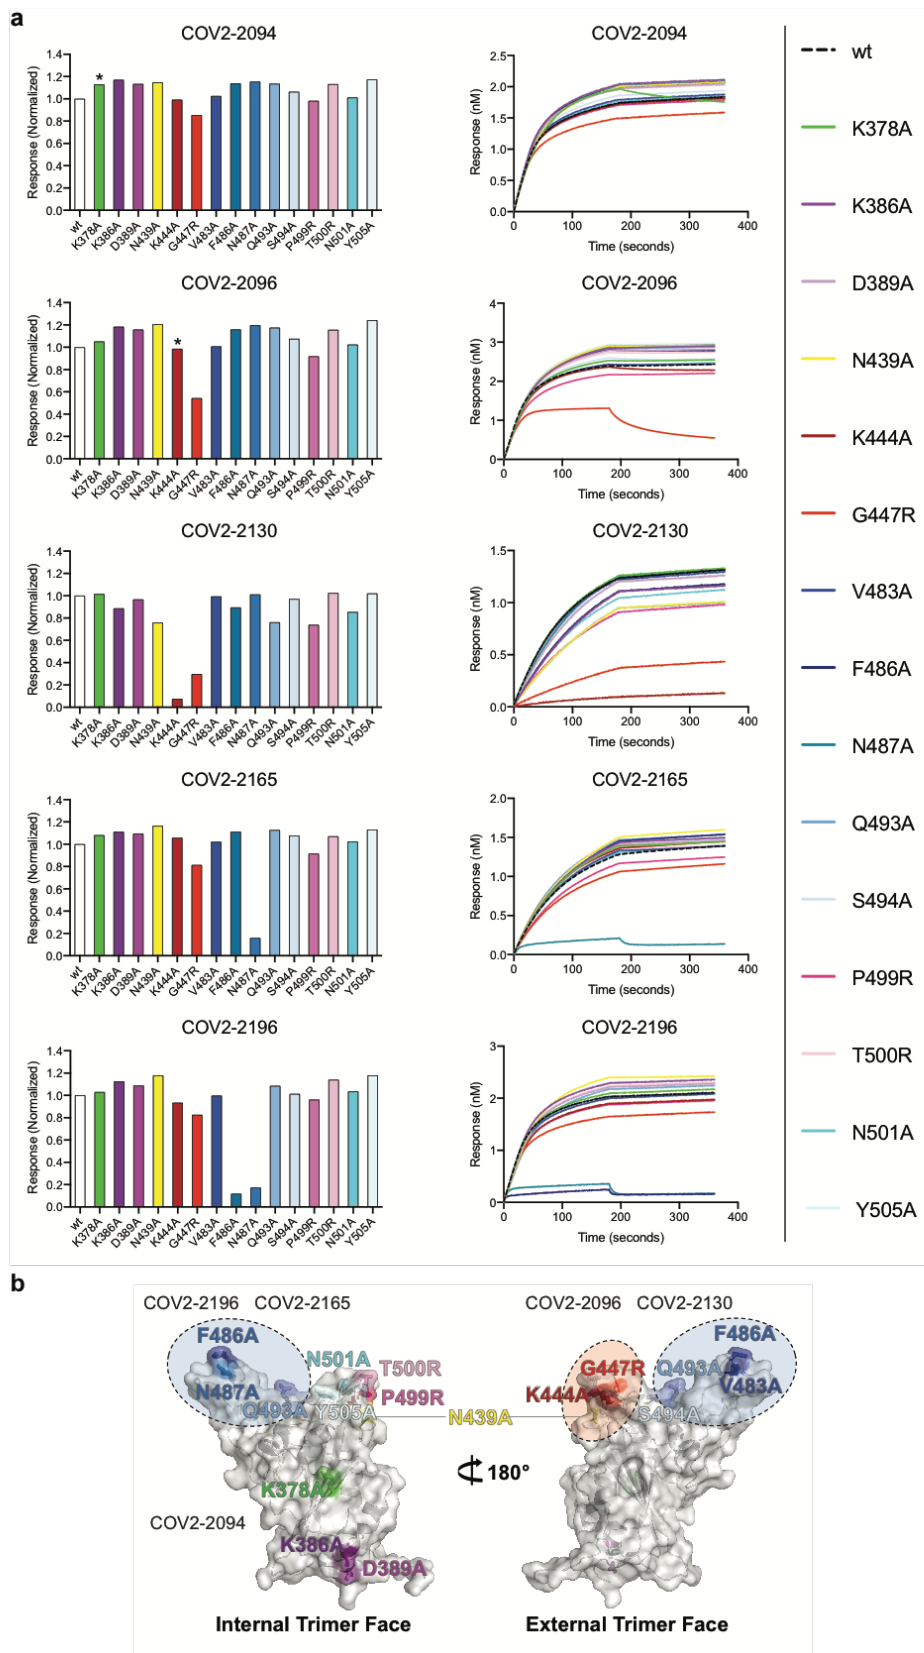

**Extended Data Table 1. Neutralization IC<sub>50</sub>, hACE2 blocking IC<sub>50</sub>, and EC<sub>50</sub> values for binding to S2P<sub>ecto</sub> or S<sub>RBD</sub> antigens for mAb panel**

| <b>MAB</b> | <b>Neutralization IC<sub>50</sub>, ng/mL</b> | <b>hACE2 blocking IC<sub>50</sub>, ng/mL</b> | <b>S2P<sub>ecto</sub> binding EC<sub>50</sub>, ng/mL</b> | <b>S<sub>RBD</sub> binding EC<sub>50</sub>, ng/mL</b> | <b>SARS-CoV S2P<sub>ecto</sub> binding EC<sub>50</sub>, ng/mL</b> |
|------------|----------------------------------------------|----------------------------------------------|----------------------------------------------------------|-------------------------------------------------------|-------------------------------------------------------------------|
| COV2-2015  | 892                                          | 68                                           | 2.2                                                      | 5.1                                                   | 2.7                                                               |
| COV2-2050  | 80                                           | 63                                           | 1.7                                                      | 1.6                                                   | —                                                                 |
| COV2-2068  | 478                                          | 166                                          | 7.4                                                      | 1.2                                                   | —                                                                 |
| COV2-2072  | 26                                           | 29                                           | 0.8                                                      | 1.0                                                   | —                                                                 |
| COV2-2082  | 204                                          | 43                                           | 1.1                                                      | 0.6                                                   | 19.9                                                              |
| COV2-2094  | 154                                          | 53                                           | 1.8                                                      | 1.4                                                   | 11.7                                                              |
| COV2-2096  | 59                                           | 67                                           | 1.0                                                      | 1.0                                                   | —                                                                 |
| COV2-2098  | 1,029                                        | 48                                           | 1.3                                                      | 0.7                                                   | —                                                                 |
| COV2-2103  | 1,969                                        | 79                                           | 2.9                                                      | 1.1                                                   | —                                                                 |
| COV2-2113  | 1,041                                        | 60                                           | 1.8                                                      | 0.6                                                   | —                                                                 |
| COV2-2130  | 107                                          | 61                                           | 1.5                                                      | 0.7                                                   | —                                                                 |
| COV2-2165  | 332                                          | 62                                           | 1.4                                                      | 0.6                                                   | —                                                                 |
| COV2-2196  | 15                                           | 48                                           | 1.2                                                      | 1.1                                                   | —                                                                 |
| COV2-2258  | 989                                          | 76                                           | 2.5                                                      | 1.6                                                   | 11.2                                                              |
| COV2-2268  | 371                                          | 2,198                                        | 91.2                                                     | 5.3                                                   | —                                                                 |
| COV2-2308  | 394                                          | 75                                           | 2.7                                                      | 1.9                                                   | —                                                                 |
| COV2-2353  | 2,891                                        | 1,750                                        | 48.0                                                     | 10.9                                                  | —                                                                 |
| COV2-2354  | 1,105                                        | 67                                           | 2.6                                                      | 3.5                                                   | —                                                                 |
| COV2-2381  | 42                                           | 27                                           | 0.8                                                      | 1.0                                                   | —                                                                 |
| COV2-2489  | 4,378                                        | —                                            | 13.0                                                     | —                                                     | —                                                                 |
| COV2-2479  | 48                                           | 50                                           | 0.4                                                      | 0.3                                                   | —                                                                 |
| COV2-2499  | 27                                           | 57                                           | 1.4                                                      | 1.1                                                   | —                                                                 |
| COV2-2539  | 274                                          | 98                                           | 1.1                                                      | 0.7                                                   | —                                                                 |
| COV2-2562  | 348                                          | 154                                          | 1.0                                                      | 0.6                                                   | —                                                                 |
| COV2-2676  | 3,247                                        | —                                            | 12.0                                                     | —                                                     | —                                                                 |
| COV2-2677  | 1,618                                        | 107                                          | 2.4                                                      | 0.7                                                   | —                                                                 |
| COV2-2733  | 356                                          | 71                                           | 2.4                                                      | 0.6                                                   | —                                                                 |
| COV2-2752  | 349                                          | 53                                           | 1.9                                                      | 0.7                                                   | —                                                                 |
| COV2-2780  | 478                                          | 10,000                                       | 86.0                                                     | 3.1                                                   | —                                                                 |
| COV2-2807  | 907                                          | 1,753                                        | 13.0                                                     | 55.1                                                  | —                                                                 |
| COV2-2812  | 1,020                                        | 1,387                                        | 45.4                                                     | 2.1                                                   | —                                                                 |

|           |       |       |       |      |     |
|-----------|-------|-------|-------|------|-----|
| COV2-2813 | 555   | 206   | 5.3   | 1.0  | —   |
| COV2-2819 | 114   | 60    | 0.9   | 0.8  | —   |
| COV2-2828 | 100   | 100   | 3.2   | 1.4  | 338 |
| COV2-2832 | 70    | 47    | 1.3   | 1.1  | —   |
| COV2-2835 | 190   | 91    | 3.4   | 1.2  | —   |
| COV2-2841 | 1,065 | 91    | 3.3   | 1.5  | —   |
| COV2-2919 | 1,091 | 1,000 | 153.0 | 90.3 | —   |
| COV2-2955 | 127   | 54    | 0.8   | 0.5  | —   |
| COV2-3025 | 37    | 41    | 1.1   | 1.1  | —   |
| rCR3022   | —     | —     | 10.2  | 1.1  | 5.2 |
| r2D22     | —     | —     | —     | —    | —   |

— : indicates no detectable binding or neutralization at the highest tested concentration
